1 **Optogenetic activation of nonhuman primate cortical and subcortical brain circuits highlights**  
2 **detection capabilities of MEG source imaging**

3

4 Alberto, GE<sup>1\*</sup>; Stapleton-Kotloski, JR<sup>2,4\*</sup>; Klorig, DC<sup>1</sup>; Rogers, ER<sup>1</sup>; Constantinidis<sup>1</sup>, C; Daunais<sup>3</sup>, JB;  
5 Godwin, DW<sup>1,2,3,4</sup>

6 1. Wake Forest School of Medicine Department of Neurobiology and Anatomy

7 2. Wake Forest School of Medicine Department of Neurology

8 3. Wake Forest School of Medicine Department of Physiology and Pharmacology

9 4. Research and Education Department, W.G. (Bill) Hefner Veterans Affairs Medical Center

10 \*Corresponding author

11 †These authors contributed equally.

12

13 **ABSTRACT**

14 Magnetoencephalography (MEG) measures neuromagnetic activity with high temporal, and  
15 theoretically, high spatial resolution. However, the ability of magnetic source imaging (MSI) to localize  
16 deep sources is uncertain. We developed an experimental platform combining MEG-compatible  
17 optogenetic techniques in non-human primates (NHPs) to test the ability of MEG/MSI to image deep  
18 signals. We demonstrate localization of optogenetically-evoked signals to known sources in the  
19 superficial arcuate sulcus of cortex and in CA3 of hippocampus at a resolution of 750  $\mu\text{m}^3$ . In response to  
20 stimulation of arcuate sulcus and hippocampus, we detected activation in subcortical and thalamic  
21 structures, or extended temporal networks, respectively. This is the first demonstration of accurate  
22 localization of deep sources within an intact brain using a novel combination of optogenetics with  
23 MEG/MSI. This approach is suitable for exploring causal relationships between discrete brain regions  
24 through precise optogenetic control and simultaneous whole brain recording.

25

26 **INTRODUCTION**

27 A fundamental goal of neuroimaging is to observe and quantify brain activity across the spatial and  
28 temporal resolutions at which it occurs. MEG holds particular promise for improving upon current  
29 neuroimaging methods because it has identical temporal resolution to EEG, with the potential for  
30 superior spatial resolution<sup>1,2</sup>. MEG detects biomagnetic fluctuations that co-occur with neuronal activity.  
31 Unlike electric fields, biomagnetic signals are not distorted by the intervening tissues of the head prior  
32 to arriving at the sensor thereby providing the estimation of the source of these signals with magnetic  
33 source imaging (MSI) an inherent advantage over source localization with EEG<sup>2</sup>. While MEG has been  
34 employed clinically for use in the pre-surgical evaluation of epilepsy<sup>7-10</sup> and in studies of deep structures  
35 such as hippocampus<sup>11</sup> and amygdala<sup>12</sup>, a detailed investigation of the resolution capabilities of MEG is  
36 currently lacking.

37  
38 Early studies employing simultaneous intracranial EEG and MEG in patients with epilepsy suggested that  
39 MEG was unable to detect activity originating in deep structures such as the hippocampus<sup>13-15</sup>. Possible  
40 explanations for this failure included concerns that the curved architecture of the hippocampus caused  
41 magnetic fields to cancel or that the distance from the MEG sensors to hippocampus may be too great<sup>16</sup>.  
42 Theoretically however, the combination of a larger number of axial gradiometers (shown to have a  
43 superior depth profile in comparison to planar gradiometers<sup>4,16</sup>), a low noise floor, minimal motion<sup>5,6</sup>,  
44 and appropriate use of beamformers<sup>3,8,11</sup> should optimize the signal-to-noise ratio (SNR) of biomagnetic  
45 signals to allow sub-mm<sup>3</sup> localization of activity<sup>5</sup> throughout the volume of the brain. However, without  
46 unequivocal demonstration in an *in vivo* preparation the degree to which the theoretical capabilities of  
47 MSI are reflected in practice remains uncertain.

48  
49 We have developed a MEG-compatible optogenetic preparation in vervet monkeys that allows  
50 simultaneous optical stimulation and MEG recordings, along with associated local field potential (LFP)

51 recordings from deep and superficial structures. Stimulation and LFP recordings were achieved with an  
52 optrode, which is a combined optical fiber/recording electrode<sup>20, 50</sup>. Optogenetic techniques are well  
53 suited for use with MEG/MSI in that they are magnetically silent and allow for precise control over  
54 neural population potentials through the use and activation of virally-expressed, light sensitive ion  
55 channels<sup>17</sup>. In this report we have relied on synthetic aperture magnetometry (SAM)<sup>3</sup>, a linearly-  
56 constrained minimum variance (LCMV) beamformer method<sup>3,8,11</sup> with a theoretical sub-mm<sup>3</sup> spatial  
57 resolution<sup>4-6</sup>. We have used SAM to convert MEG signals into whole-brain statistical parametric maps  
58 (SPMs), differentiating it from more traditional EEG and MEG dipole analyses<sup>3</sup>. Using this combination of  
59 approaches, we elicited and measured both biomagnetic and electrophysiological activity in two  
60 representative brain areas, the arcuate sulcus of the cerebral cortex and within the CA3 region of the  
61 hippocampus in vervet monkeys. We demonstrate the ability to selectively stimulate and detect  
62 neuronal activity in these areas, as well as to accurately localize discrete optogenetically-elicited sources  
63 of activity in brain regions downstream from stimulated areas. We further demonstrate the utility of  
64 combining optogenetics and MEG/MSI in experimenter-controlled functional brain mapping across a  
65 wide range of spatiotemporal scales. We propose that the tight temporal and spatial control over neural  
66 populations afforded with optogenetics coupled with whole brain, high spatiotemporal resolution MEG  
67 recordings will enable a new approach to functional neuroimaging.

68

## 69 **RESULTS**

### 70 ***Electrophysiology of Early Expression***

71 Three vervet monkeys were injected with AAV10-CaMKIIa-ChR2-eYFP and an optrode was implanted at  
72 the site of transfection. After the animals had recovered, it was determined whether there was a  
73 detectable LFP via the indwelling optrode during the early expression period. All reported  
74 experimentation and data acquisition occurred under anesthesia. Optical pulses were delivered through

75 the implanted fiber at both the cortical and hippocampal sites to test the response of newly transfected  
76 tissue to stimulation. Functional expression was determined using optogenetic intensity-response  
77 curves at each site 2, 5, and 7 weeks post-injection. An optogenetically evoked potential was detectable  
78 from depth recordings by 5 weeks post-expression and had stabilized by ~7 weeks (Figure 1c-e; cortical:  
79 baseline (2 week) 95% confidence interval (CI) [-0.151, 0.374], post-expression (5 week) 95% CI [0.522,  
80 1.12], post-expression (7 week) 95% CI [0.683, 1.09], hippocampal: baseline (2 week) 95% CI [-4.55e-3,  
81 0.455], post-expression (5 week) 95% CI [1.31, 1.65], post-expression (7 week) 95% CI [1.50, 1.89]).

82

### 83 ***MEG Recordings of Early Expression***

84 We analyzed post-surgical (2 week) MEG data using SAM. Consistent with the electrophysiological  
85 recordings obtained in the same week, there were no detectable changes (local maxima or minima) in  
86 the SAM statistical parametric maps (SPMs) at the site of stimulation, and the maps were qualitatively  
87 similar to the pre-surgical control scans (Not shown - see Methods for beamforming parameters). We  
88 conclude that expression of Chr2 at two weeks post-injection was insufficient to generate an optically  
89 evoked response that could be identified using SAM, further evidence that our preparation is insensitive  
90 to light stimulation in the absence of Chr2.

91

92 Post-mortem, fluorescence confocal microscopy revealed Chr2-eYFP at the targeted sites of  
93 transfection, indicating uptake of the vector by the surrounding neurons and expression of the  
94 transgene. Labeled neurons were observed in the posterior wall of arcuate cortex corresponding to area  
95 8a of the monkey cortex<sup>23,24</sup> (Figure 1ai). Hippocampal imaging revealed Chr2-eYFP labeled neurons in  
96 anterior dorsal hippocampus corresponding to area CA3<sup>24</sup> with labeled efferent connections observable  
97 in the surrounding tissue (Figure 1bi). Structural MRI prior to necropsy confirmed placement of the

98 optrode in both the posterior wall of arcuate sulcus and in anterior dorsal hippocampus<sup>25</sup> (Figures 1aii-iii  
99 and Figures 1bii-iii).

100

101 As a positive control for MSI detection and localization accuracy, we presented 119, 50 ms pulses of  
102 white light to the left lower quadrant of the visual field of the left eye. (The right eye was closed.) In  
103 contrast to the lack of optogenetic biomagnetic responses at 2 weeks, visual stimulation experiments  
104 conducted at this time point demonstrated SAM peak voxels in the right occipital lobe ( $\pm 50$  ms map  
105 window relative to stimulus onset, bandwidth of 20-35 Hz, pseudo-t = 0.3) consistent with the early  
106 cortical component of visual evoked potentials<sup>22</sup> (Figure S1aviii). In addition to activation in occipital  
107 cortex, SAM also revealed peaks associated with the visual network, including (aiii.) left optic tract ( $\pm 75$   
108 ms map, 12-35 Hz bandwidth, pseudo-t = 0.4), (aiv.) left lateral geniculate n. ( $\pm 50$  ms map, 20-50 Hz  
109 bandwidth, pseudo-t = 0.4), and (avii.) left superior colliculus ( $\pm 50$  ms map, 20-60 Hz, pseudo-t = 0.4.  
110 Additional peaks were seen in (aii.) left anterior commissure ( $\pm 75$  ms map, 12-35 Hz bandwidth, pseudo-  
111 t = 0.4), (av.) right posterior hippocampus ( $\pm 75$  ms map, 12-55 Hz bandwidth, both pseudo-t's = 0.3),  
112 (avi.) right posterior white matter tracts ( $\pm 75$  ms map, 12-60 Hz bandwidth, pseudo-t = 0.4), and (ai.)  
113 right arcuate cortex ( $\pm 75$  ms map, 12-120 Hz bandwidth, pseudo-t = 0.6.). Importantly, right arcuate and  
114 left hippocampal responses were also detected in the LFP in response to visual stimulation (Figure S1b).  
115 The visual stimulation experiment, in addition to serving as a positive control for evoked signals, also  
116 demonstrates that SAM can localize primary sensory cortex in response to stimulation, that it can reveal  
117 subcortical brain structures known to be involved in the processing of visual stimulation, and that  
118 activated white matter tracts may also localized with SAM.

119

120 ***MEG Recordings of Stable Expression***

121 Eight weeks after transfection, and once the neural response to optical stimulation had reached a  
122 plateau, MEG recordings commenced. Figure 2a depicts an example of optogenetic activation (50 ms  
123 square pulses) in one NHP as localized by dual-state SAM to the posterior bank of the right arcuate  
124 sulcus in the coronal (i), sagittal (ii), and axial planes (iii), as well as additional cortical peaks (local  
125 maxima or minima in the SAM SPMs, Figure 2aii) near the site of optical stimulation. Peaks in the SAM  
126 SPMs (local maxima or minima in the maps, here in units of pseudo-t scores) can be interpreted as  
127 significant voxels in comparison to baseline and represent voxels of highly synchronous (red) or  
128 desynchronous (blue) activity within the frequency band of interest. All brain images are depicted in  
129 radiological coordinates, in which the right hemisphere is presented on the left. The whole brain, un-  
130 thresholded, dual-state SAM SPM is depicted in Figure 2aiv; note the region of synchronized activity (red  
131 voxels) arising from the site of activation and surrounded by desynchronized activity (blue voxels). For  
132 Figures 2ai-iv, the dual-state beamforming parameters for the map were a  $\pm 75$  ms window relative to  
133 stimulus onset, for a frequency band of 15-35 Hz, and resulted in a pseudo-t score of 0.6. Figure 2b  
134 depicts the SAM arcuate peaks corresponding to four additional and different optical stimulus inputs.  
135 Figures 2bi-ii present peak activations in right arcuate for one NHP (same subject as in Figure 2a) and  
136 Figures 2biii-iv shows right arcuate stimulation for a second NHP. Figure 2bi depicts the arcuate peak  
137 (mapped at a  $\pm 3.5$  s window relative to stimulus onset, bandwidth of DC-20 Hz, pseudo-t = 0.5) in  
138 response to 8 Hz, sine waves (i.e., sinusoidal-modulation of the LED), and Figure 2bii shows the arcuate  
139 peak in response to 40 Hz sine waves ( $\pm 3.5$  s map window, bandwidth of 20-50 Hz, pseudo-t = 0.7). The  
140 results for arcuate stimulation in a second NHP are presented in Figures 2biii-iv; Figure 2biii shows the  
141 SAM arcuate peak in response to 10 ms square wave pulses ( $\pm 600$  ms map, bandwidth of 3-70 Hz,  
142 pseudo-t = 0.2), whereas Figure 2biv exhibits arcuate activity elicited by 20 Hz square wave pulse trains  
143 (5 ms width for each square wave;  $\pm 200$  ms map, bandwidth of 5-70 Hz, pseudo-t = 0.3). Details on the  
144 stimuli and beamformer parameters for each stimulus type are presented in Methods. MSI can also be

145 used to construct virtual electrodes (source series) for any voxel in the brain, providing a continuous,  
146 wide-band, sub-millisecond readout of activity that may provide similar neurophysiological data relative  
147 to that resulting from an actual invasive electrode<sup>7</sup>. Figure 2bv presents a single trial of a local field  
148 potential (white) recorded from the indwelling optrode and a simultaneous SAM virtual electrode (red,  
149 viewing filters set from 1-30 Hz) extracted from the arcuate peak shown in Figure 2biii. The blue vertical  
150 line indicates the time of stimulus onset, in this case a 10 ms square wave pulse. Both the LFP and virtual  
151 electrode exhibit a rapid rise and peak in activity following stimulus onset, and both qualitatively share  
152 similar features and time courses on a single trial basis.

153  
154 Consistent activity was also elicited in the left hippocampi of two NHPs in response to a variety of optical  
155 stimulus types. Figure 3a presents an example of the left SAM hippocampal peak co-localized to the site  
156 of optical stimulation in a third subject, in this case a single, 60 s duration, 20 Hz sine wave. Figures 3ai-iii  
157 depict the peak in the coronal (i), sagittal (ii), and axial planes (iii), and Figure 3aiv illustrates the un-  
158 thresholded, whole-brain SAM dual state map ( $\pm 4$  s window, 10-30 Hz band, pseudo-t = 1.7) associated  
159 with the 20 Hz sine wave input. Note the narrow band of synchronization (red) confined to the dorsal  
160 aspect of the left hippocampus, and synchronous activity propagating towards left insula (e.g. see Figure  
161 5a). The second row of Figure 3 depicts the left hippocampal peaks elicited by additional optogenetic  
162 stimulation for two different NHPs. The first two coronal slices (Figures 3bi-ii) correspond to  
163 hippocampal recordings obtained from a third NHP (same subject as presented in Figure 3a), and the  
164 last two coronal slices depict activity for the first NHP, the latter for whose arcuate peaks were depicted  
165 in Figure 2a. For Figure 3bi the stimulation parameters were single triangular (sawtooth) waves ( $\pm 150$   
166 ms windows, 8-45 Hz band, pseudo-t = 0.8); for Figure 3bii the parameters were 10 ms square wave  
167 pulses ( $\pm 150$  ms windows, bandwidth of 7-85 Hz, pseudo-t = 0.2). Figure 3bv presents a single trial of a  
168 local field potential and the simultaneous SAM virtual electrode (viewing filters set from 1-35 Hz)

169 extracted from the hippocampal peak shown in Figure 3bi. The blue vertical line indicates the time of  
170 the optical sawtooth onset. Both the LFP and virtual electrode exhibit a rapid rise and peak in activity  
171 following stimulus onset, and both qualitatively share similar features and time courses on a single trial  
172 basis. Hippocampal responses for the first NHP are depicted in Figure 3biii-iv with a hippocampal peak  
173 elicited by 8 Hz sine waves ( $\pm 2$  s windows, DC-15 Hz band, pseudo-t = 1.0, Figure 3biii), and another  
174 hippocampal peak elicited by 40 Hz sine waves ( $\pm 2$  s windows, 20-55 Hz band, pseudo-t = 0.6) shown in  
175 Figure 3biv.

176

### 177 **Functional Mapping**

178 In addition to eliciting biomagnetic activity at the transfection site, optogenetic stimulation also resulted  
179 in propagation through well-described downstream networks. Because the SAM maps were constructed  
180 for the whole brain volume, additional peaks were revealed in the various time-frequency SPMs.  
181 Interestingly, right arcuate stimulation elicited additional SAM peaks in a pattern that conformed to a  
182 known motor-associative network, the cortico-striatal-pallido-thalamocortical (CSPTC) motor  
183 network<sup>26,27</sup>. This network was revealed in both NHPs who received arcuate stimulation across different  
184 optical stimuli. An example of the CSPTC maps obtained for the first subject (as seen in Figure 2bi) are  
185 shown in Figure 4a as a function of 8 Hz sine wave input. In addition to the activation of right arcuate  
186 sulcus (ii), SAM maps also exhibited peaks in (i.) right anterior bank of the arcuate sulcus ( $\pm 1$  s windows,  
187 DC-12 Hz band, pseudo-t = 0.3), (iii.) right corona radiata/ dorsolateral tip of the caudate n. ( $\pm 4$  s  
188 windows, DC-15 Hz band, pseudo-t = 0.5), (iv.) right caudate n. ( $\pm 2.5$  s windows, DC-50 Hz band, pseudo-  
189 t = 0.7), (v.) right putamen/ external segment of globus pallidus ( $\pm 4$  s windows, DC-15 Hz band, pseudo-t  
190 = 0.5), vi. and vii. posterior bank of contralateral (left) arcuate sulcus, coronal and sagittal slices,  
191 respectively ( $\pm 3$  s windows, DC-15 Hz band, pseudo-t = 0.4), (viii.) right globus pallidus ( $\pm 4$  s windows,  
192 DC-15 Hz band, pseudo-t = 0.4), (ix.) right ventroposterior medial / ventroposterior lateral n. of thalamus



193 ( $\pm 4$  s windows, DC-15 Hz band, pseudo-t = 0.4), (x.) right medial dorsal n. of thalamus ( $\pm 4$  s windows, DC-  
194 15 Hz band, pseudo-t = 0.4), (xi.) ventral posterior thalamus ( $\pm 3.5$  s windows, DC-20 Hz band, pseudo-t =  
195 0.3), and (xii.) parietal-occipital association area of the intraparietal sulcus ( $\pm 2$  s windows, DC-50 Hz  
196 band, pseudo-t = 0.6). A second example of right hemispheric CSPTC network activity for a different NHP  
197 in response to 20 Hz square wave pulse trains is presented in Figure 4b. Owing to the contrast of this  
198 subject's MRI, the thalamic peak identities were less discernible. Despite this, SAM maps revealed peaks  
199 in (i.) caudate n. (green,  $\pm 200$  ms windows, 5-70 Hz band, pseudo-t = 0.3) and corona radiata (yellow,  
200  $\pm 200$  ms windows, 5-70 Hz band, pseudo-t = 0.3), ii. thalamus (green,  $\pm 200$  ms windows, 5-70 Hz band,  
201 pseudo-t = 0.3) and caudate n. (yellow,  $\pm 200$  ms windows, 5-70 Hz band, pseudo-t = 0.3), iii. posterior  
202 dorsal bank of the arcuate sulcus (green,  $\pm 200$  ms windows, 5-70 Hz band, pseudo-t = 0.3) and two  
203 thalamic peaks (yellow, both  $\pm 200$  ms windows, 5-70 Hz band, pseudo-t's = 0.3), iv. thalamus ( $\pm 200$  ms  
204 windows, 5-70 Hz band, pseudo-t = 0.3), v. posterior ventral bank of arcuate sulcus (green, site of  
205 stimulation,  $\pm 200$  ms windows, 5-70 Hz band, pseudo-t = 0.3), corpus callosum (yellow,  $\pm 200$  ms  
206 windows, 5-70 Hz band, pseudo-t = 0.3), and caudate n. (yellow,  $\pm 200$  ms windows, 5-70 Hz band,  
207 pseudo-t = 0.3), vi. caudate n. (green,  $\pm 200$  ms windows, 5-70 Hz band, pseudo-t = 0.3) and  
208 mesencephalic nuclei (yellow,  $\pm 200$  ms windows, 5-70 Hz band, pseudo-t = 0.3), vii. deep mesencephalic  
209 n. ( $\pm 200$  ms windows, 5-70 Hz band, pseudo-t = 0.3), viii. substantia nigra ( $\pm 200$  ms windows, 5-70 Hz  
210 band, pseudo-t = 0.3), ix. tegmental n. ( $\pm 200$  ms windows, 5-70 Hz band, pseudo-t = 0.3), x. pontine or  
211 mesencephalic n. ( $\pm 200$  ms windows, 5-70 Hz band, pseudo-t = 0.3), and xi., and xii. all peaks in primary  
212 motor cortex (area 4,  $\pm 300$  ms windows, 4-70 Hz band, all pseudo-t's = 0.2).

213

214 Similarly, left hippocampal stimulation also elicited activity throughout the temporal network.

215 Functional hippocampal and temporal networks engaged by a 20 Hz optical sine input to left

216 hippocampus (as seen in Figures 3ai-iv) are shown for the third NHP in Figure 5a. Whole-brain SAM

217 SPMs for this stimulus exhibited peaks in the following areas: (i.) left insular proisocortex/temporopolar  
218 proisocortex ( $\pm 4$  s windows, 10-30 Hz band, pseudo-t = 2.3), (ii.) left para-insular cortex ( $\pm 4$  s windows,  
219 10-30 Hz band, pseudo-t = 2.4), (iii.) left dorsolateral amygdala (lateral n.,  $\pm 4$  s windows, 10-30 Hz band,  
220 pseudo-t = 2.0), (iv.) left basolateral/lateral amygdala ( $\pm 4$  s windows, 10-30 Hz band, pseudo-t = 2.0), (v.)  
221 left hippocampus, site of stimulation ( $\pm 4$  s windows, 10-30 Hz band, pseudo-t = 1.7), (vi.) left  
222 parasubiculum/presubiculum of hippocampus ( $\pm 4$  s windows, 10-30 Hz band, pseudo-t = 1.6), (vii.)  
223 contralateral (right) hippocampus ( $\pm 4$  s windows, 10-30 Hz band, pseudo-t = 2.6), and (viii.) left pontine  
224 reticular activating formation ( $\pm 4$  s windows, 10-30 Hz band, pseudo-t = 2.0). A second example of  
225 hippocampal network activity in a different NHP (as seen in Figure 3biii) in response to 8 Hz sine wave  
226 input is presented in Figure 5b. The SAM peaks elicited by this stimulus are as follows: (i.) left insula ( $\pm 2$  s  
227 windows, DC-15 Hz band, pseudo-t = 1.0), (ii.) PGa/IPa association areas of left temporal cortex (lateral  
228 yellow peak,  $\pm 2$  s windows, DC-15 Hz band, pseudo-t = 1.0), left hippocampus (green peak, site of  
229 stimulation,  $\pm 2$  s windows, DC-15 Hz band, pseudo-t = 1.0), and possible left red n. (yellow, medial peak,  
230  $\pm 2$  s windows, DC-15 Hz band, pseudo-t = 0.6), (iii.) area TEA/TEM of left temporal cortex ( $\pm 2$  s windows,  
231 DC-15 Hz band, pseudo-t = 1.0), and (iv.) area TL/TFM of right temporal cortex ( $\pm 2$  s windows, DC-15 Hz  
232 band, pseudo-t = 0.9). A third example of hippocampal network activity in response to 40 Hz sine wave  
233 input (same subject as in Figure 5b) is presented in Figure 5c. The SAM peaks are as follows: (i.) left  
234 anterior hippocampus ( $\pm 1.5$  s windows, 20-50 Hz band, pseudo-t = 0.9), (ii.) left hippocampus, site of  
235 stimulation ( $\pm 2$  s windows, 20-55 Hz band, pseudo-t = 0.6), (iii.) possible left deep mesencephalic n. ( $\pm 2$  s  
236 windows, 20-55 Hz band, pseudo-t = 0.7), and (iv.) left pulvinar n. of thalamus ( $\pm 1.5$  s windows, 20-50 Hz  
237 band, pseudo-t = 0.4). Collectively, these results indicate the utility of combining optogenetic techniques  
238 with MEG for functional brain mapping and mapping of deep structures, even under anesthesia.

239

240 **DISCUSSION**

241

242 This study represents the first successful combination of optogenetics with magnetic source imaging of  
243 biomagnetic signals in non-human primates, and provides additional information on the relationship  
244 between MEG signals and the underlying electrical activity in the brain<sup>28</sup>. In this study, we have  
245 demonstrated anatomically-localized and temporally-precise control over neural activity in a MEG-  
246 compatible optogenetic preparation.

247

248 We provide evidence of the feasibility of optogenetic stimulation in the MEG environment and show  
249 that after optogenetic stimulation, both arcuate cortex and hippocampus can be localized by MSI across  
250 multiple NHPs, across stimulus types, and at a voxel size of 750  $\mu\text{m}^3$ . In addition, SAM can be used  
251 localize activity to NHP occipital cortex in response to visual stimulation. While the amplitude of the  
252 localized signal (as given by SAM pseudo-t score) varies, this is likely due to the type of stimulus input  
253 and can be used in the future to examine the effects of different time-varying inputs into a target  
254 structure. This study also provides evidence that a signal generated in deep brain structures is  
255 detectable with MEG, including hippocampus, and that downstream activation of other structures such  
256 as amygdala, caudate nucleus, putamen, globus pallidus, thalamic nuclei, superior colliculus, and even  
257 white matter is also detectable. Detection is possible even in the presence of high noise and suboptimal  
258 conditions resulting from the experimental preparation (e.g., the small size of the vervet brain, a large  
259 heartbeat artifact, artifact from anesthesia monitoring equipment, etc.).

260

261 Studies using non-human primates in MEG have previously demonstrated the feasibility of equivalent  
262 current dipole<sup>32</sup> and beamformer<sup>33</sup> analyses in monkeys. This study extends these observations to  
263 analysis of areas beyond superficial cortex into deep structures in an NHP species with a smaller brain,  
264 strongly supporting the validity of MSI in detecting deep brain signals. Furthermore, this study uses

265 experimentally controlled, optogenetically generated signals from a known source and onset time to  
266 demonstrate the accuracy of localization. The current results suggest that a combination of whole head  
267 coverage with axial gradiometers, a low noise floor, low head movement, and appropriate use of  
268 beamformers allows deep localization of activity that is consistent with theoretical investigations and  
269 data from epilepsy patients<sup>2-5,8,11</sup>. SAM normalizes MEG signals with respect to the noise in the unique  
270 recording environment and with distance from the sensors; therefore, deep signals are localizable given  
271 sufficient signal-to-noise ratio (SNR). SNR amplification in this study was achieved through repeated  
272 presentations of the stimuli, by low head motion, and by beamforming itself, which also removes noise<sup>7</sup>.  
273  
274 The relevance of this finding to the clinical evaluation of epilepsy surgery candidates is significant.  
275 Currently, MEG is FDA approved for pre-surgical evaluation of epilepsy, but is often limited to dipole  
276 analyses only<sup>16,34,35</sup>. Unfortunately, dipole analyses break down with low SNR<sup>5</sup>, which is often the case  
277 with deep signals. The most common epilepsy type requiring surgical resection is mesial temporal lobe  
278 epilepsy wherein the seizure generator is deep in the brain<sup>36</sup>, thus methods permitting the localization  
279 of deep signals with MEG in such patients is of great utility in surgical planning. To this point, our results  
280 demonstrate that SAM can accurately localize a deep signal to its source (hippocampus). Furthermore,  
281 while Mikuni et. al. estimated 4 cm<sup>2</sup> of active brain tissue is required for the localization of spikes<sup>13</sup>, our  
282 results show that significantly less tissue may be required to generate a detectable MEG signal, simply  
283 because the vervet hippocampus is far smaller, as are the structures comprising the CSPTC and visual  
284 networks. Additionally, the injection parameters of our viral vector<sup>37-39</sup> and microscopy suggest that the  
285 volume activated was only a few mm<sup>3</sup>, and while it is likely that feed forward activation occurs we  
286 suspect that this falls well below 4 cm<sup>2</sup> of tissue (see Figures 1ai, bi; Figure 3aiv, for examples).  
287

288 The results of this study suggest that optogenetics can be combined with MEG imaging in non-human  
289 primates to permit precise functional mapping. Stimulation of arcuate sulcus activated the cortico-  
290 striato-pallido-thalamo-cortical (CSPTC) network such that voxels of peak activation fell within a  
291 functionally and anatomically described pathway<sup>26,27</sup>. Further, hippocampal stimulation evoked  
292 widespread activity in regions such as amygdala, insula, and contralateral hippocampus. Finally, natural  
293 visual stimulation using flashes of light elicited activity throughout the visual system. In the future, the  
294 combination of optogenetic techniques with MEG/MSI could be used to variably activate or inactivate  
295 discrete parts of the brain with excitatory or inhibitory opsins to reveal functional relationships that  
296 have not previously been described.

297  
298 The temporal resolution of MEG enables this combination of techniques to map transient interactions  
299 that are not detectable using other functional imaging approaches<sup>40</sup>. Recent analysis techniques  
300 designed to increase fMRI sampling rate (e.g. dynamic functional magnetic resonance inverse imaging<sup>41</sup>),  
301 have achieved a maximum sampling rate around 10 Hz with a 5 mm<sup>3</sup> voxel size<sup>42,43</sup> with the 10 Hz period  
302 corresponding to events lasting 100 ms. In contrast, arcuate cortex was stimulated with trials of 50 ms  
303 square wave inputs and beamforming revealed arcuate peaks at 75 ms, and with a voxel size of 750 μm<sup>3</sup>  
304 (Figure 2a), and 50 ms flashes of light elicited SAM peaks at 50 ms in occipital cortex (Figure S1aviii).  
305 These fast-transient events occur well beyond the temporal resolution of metabolically based methods  
306 and the recruitment of downstream areas can happen rapidly, suggesting that functional maps and  
307 connectivity analyses will vary depending on the duration and sampling rate of analyzed data. For  
308 example, fMRI network architecture has been demonstrated to change over short timescales  
309 (hours/minutes) during learning<sup>44</sup>, while analysis of MEG based network architecture has demonstrated  
310 variability on the order of milliseconds<sup>45</sup>. It is clear from this demonstration that the high sampling rates  
311 of MEG coupled with SAM affords exceptional advantages over traditional neuroimaging techniques.

312 However because the beamformer problem is without a unique solution there will always be inherent  
313 uncertainties in localization<sup>46</sup> without “ground truth” experiments utilizing controlled inputs to known  
314 brain targets. To this end, the approach we report may assist in efforts to continually to improve inverse  
315 problem solutions to yield greater certainty<sup>30,47</sup>.

316

317 In addition to the measurement of functional circuits, optogenetic control of neuronal field potentials  
318 combined with MEG will make it possible to investigate relationships that exist due to specific, transient  
319 activity patterns. For example, it may be possible to capture native activity at a recording site, use  
320 optogenetic stimulation to approximate population activity, and map the resultant response irrespective  
321 of state or behavior<sup>48</sup>. We anticipate that experimenter control over discrete brain regions of interest  
322 coupled to whole brain recording and detection of downstream responders will provide a platform for  
323 improved investigation of brain function in both normal and pathological conditions. Subthreshold  
324 modulation could be used to investigate population activity that gives rise to neural oscillations<sup>49,50</sup> and  
325 suprathreshold synchronous modulation could be used to mimic epileptiform discharges in the study of  
326 epilepsy<sup>50</sup>.

327

328 The results of this study support, through direct measurement, the assumed theoretical ability of  
329 MEG/MSI to detect and localize experimentally controlled activity in the brain at very fine temporal and  
330 spatial resolution. We have demonstrated the feasibility of localizing activity in the brains of vervet  
331 monkeys using whole head instrumentation designed for human subjects. By combining optogenetic  
332 stimulation in MEG with beamformer analysis it is possible to empirically determine the practical  
333 abilities and limitations of MEG/MSI. Additionally, it is clear that this combination of techniques may  
334 permit functional brain mapping in spatial and temporal domains not otherwise possible with current  
335 functional imaging techniques.

336

## 337 **ACKNOWLEDGEMENTS**

338 CC was supported by NIH grant R01 MH097695. JBD was supported by NIH grant NIAAA R21 AA028795,  
339 P01AA021099- S1 and UL1TR001420. DG was supported by NIH Grant NIAAA R01AA016852,  
340 P50AA026117, W81XWH-13-2-0095, NINDS 1R21NS116519, and UL1TR001420. DK was supported by  
341 NIH grants NIAAA R01AA016852, NINDS 1R01NS105005, and NINDS 1R21NS116519. GA was supported  
342 by NIAAA F30 AA 23708-02 and NINDS NS073553. JSK was supported by VA/DoD W81XWH-13-2-0095.  
343 We wish to thank the Department of Neurology and Dr. Gautam Popli for providing scanner time on the  
344 MEG and the Translational Imaging Program (then Center for Biomolecular Imaging) for MRI pilot scans.  
345 We acknowledge the Wake Forest University Primate Center for providing animals for this study  
346 OD010965 (Jay Kaplan) and the Wake Forest Biology Microscopic Imaging Core Facility. We also  
347 acknowledge support from the W.G. (Bill) Hefner Veterans Affairs Medical Center and VA Mid-Atlantic  
348 Mental Illness, Research, Education, and Clinical Center. Finally, we would like to thank Dr. Caroline Bass  
349 for providing the viral construct used in this study.

350

## 351 **ONLINE METHODS**

352

### 353 ***Surgical Targeting***

354 All studies were approved by the Animal Care and Use Committee of Wake Forest School of Medicine.  
355 This study was repeated in three female vervet monkeys, *Chlorocebus aethiops*, aged 15-16 years and  
356 weighing between 4.99-6.75 kg. Each animal was mounted in an MRI compatible stereotaxic frame with  
357 lipid containing ear bars, and T1-weighted anatomical images were acquired using a 3D-MPRAGE 0.5  
358 mm isotropic sequence in a Siemens 3 T Skyra system with a custom built 8-channel flexible head coil  
359 (Dr. Cecil Hayes, Univ. Washington). The animals were removed from the stereotaxic frame and an

360 additional structural MRI scan was acquired in which the animals were fitted with three lipid biomarkers  
361 fixed in the location of the MEG fiducials (placed in the conventional three-point fiducial locations) for  
362 co-registration with MEG data. The locations of the MEG fiducials were tattooed on the animals prior to  
363 the start of the study to ensure precise co-registration across multiple sessions. In one animal a post-  
364 mortem MRI was conducted after implantation and recording to confirm stereotaxic targeting (Figures.  
365 1a<sub>ii-iii</sub> and b<sub>ii-iii</sub>).

366

367 Using Medical Image Processing, Analysis, and Visualization (MIPAV) software available from the NIH,  
368 stereotaxic coordinates were generated for CA3 of left hippocampus and for the posterior wall of the  
369 contralateral, right arcuate sulcus.

370

### 371 ***Surgery***

372 Animals were securely mounted and centered in a surgical stereotaxic frame. The cranium was exposed  
373 and ten ceramic screws (Rogue Research Inc.; Montreal, Canada) were placed around the perimeter of  
374 the surgical margin. A craniotomy (~17 mm) was then drilled over the coordinates for each targeted  
375 brain region. A custom polyether ether ketone (PEEK) cannula with a Teflon stop was advanced through  
376 the dura on a stainless steel stylette. The stylette was retracted leaving the cannula in place; injection of  
377 the viral vector and placement of the optrode (optical fiber and recording electrode) was done through  
378 the cannula to ensure co-localization. A gas-tight, micro volume Hamilton Syringe was then filled with  
379 AAV10-CaMKIIa-ChR2-eYFP (provided by Dr. Caroline Bass, SUNY Buffalo) and 4  $\mu$ L of virus was injected  
380 at each coordinate through a 38 G needle at a rate of 0.5  $\mu$ L/minute. The syringe was left in place for 5  
381 minutes following the injection and slowly removed. A custom made, chronically indwelling optrode was  
382 implanted to a depth of 0.5 mm above the injection coordinates. The optrode consisted of either a 200  
383 or 400  $\mu$ m diameter fiber optic cable (ThorLabs, Inc.; Newton, NJ) coupled to a 75  $\mu$ m Pt/Ir electrode



384 (FHC, Inc.; Bowdoin, ME) or a 35  $\mu\text{m}$  formvar-coated Tungsten electrode (California Fine Wire Co.;  
385 Grover Beach, CA), which extended 0.7 mm beyond the tip of the optical fiber. Lastly, a custom (PEEK)  
386 headwell with a removable cap (Crist Instruments Co., Inc.; Bethesda, MD) was fitted over each  
387 craniotomy and cemented in place. The craniotomy was sealed with bone cement securing the optrode  
388 in place.

389  
390 To ensure electrical and magnetic silence, we avoided the photovoltaic effect by designing optrodes  
391 with a beveled tip so that the conductive surface was in shadow rather than in the cone of light<sup>22–24</sup>. The  
392 absence of artifact was confirmed in saline and in pre-expression control recordings.

393

#### 394 ***Control for Photoelectric Effects***

395 Prior to implantation, a combined fiberoptic/recording electrode (optrode) was submerged in saline and  
396 LED stimulation was conducted to rule-out artifacts associated with the photovoltaic effect. No transient  
397 artifact associated with the LED was detected upon stimulation and there was no significant difference  
398 in LFP amplitude from the pre-stimulation period suggesting the optrode design used was not  
399 susceptible to the photovoltaic effect.

400

#### 401 ***Electrophysiology Recordings***

402 Recordings were conducted under anesthesia, using propofol (200-400  $\mu\text{g}/\text{kg}/\text{min}$ ) for the MEG scans  
403 and ketamine (12-15 mg/kg) and dexmedetomidine (0.0075-0.015 mg/kg) for the electrophysiological  
404 recordings. MEG recordings were conducted in a magnetically shielded room (MSR; Vacuumschmelze  
405 GmbH & Co.; Hanau, Germany) with a CTF MEG<sup>TM</sup> whole cortex helmet equipped with 275 first-order  
406 axial gradiometer coils, each with a 5 cm baseline and 22.4 mm average inter-sensor spacing and 29  
407 reference sensors (CTF MEG International Services Limited Partnership; Coquitlam, BC, Canada). MEG

408 recordings were sampled at 2400 Hz for a bandwidth of DC-600 Hz. Data were powerline filtered offline  
409 for 60 Hz harmonics with a 4 Hz width, and synthetic third order gradiometry was applied.  
410 Simultaneously recorded LFP data were amplified using a Nicolet intraoperative monitoring system  
411 (Natus Medical; Pleasanton, CA) sampled at 5 kHz with maximum range of +/- 5 mV with a bandpass  
412 filter of 0.1 Hz to 3 kHz and recorded in line with MEG data. On separate days without MEG recordings,  
413 LFP data were recorded using a SciWorks recording system (DataWave Technologies; Loveland, CO), AM-  
414 3600 extracellular amplifiers (A-M Systems; Carlsborg, WA), and a T8G100 headstage amplifier (Triad  
415 Biosystems International; Durham, NC) and bandpass filtered at 0.3 Hz to 5 kHz, with a gain of 500 and a  
416 40 kHz sampling rate.  
417  
418 Prior to the optrode implantation, 8-minute resting-state MEG scans were acquired to establish baseline  
419 activity. Two weeks after surgery (before high level transgene expression, and after the animal had  
420 recovered from surgery) animals were stimulated for the first time at a range of optical intensities (10.3-  
421 75.6 mW/mm<sup>2</sup> for 200  $\mu$ m and 2.6-18.9 mW/mm<sup>2</sup> for 400  $\mu$ m fiber). These recordings were conducted  
422 in the MEG MSR under anesthesia as described, as well as in separate sessions in a dedicated  
423 electrophysiology suite. A variety of optical stimuli were delivered, including single 10 ms or 50 ms  
424 square pulses of 473 nm light from either a light emitting diode (ThorLabs) or from a laser (Shanghai  
425 Dream Laser Technology Co., Ltd; Song Jiang, Shanghai, China), 20 Hz square wave pulse trains, single  
426 triangular (sawtooth) ramps, and sine waves at 8, 20, or 40 Hz (see below for more stimulus details).  
427 Pulse duration of the laser was controlled with a 2 mm Uniblitz laser shutter and a D880C Uni-stable  
428 driver (Uniblitz Electronic; Rochester, NY). LED pulse durations were controlled with custom MATLAB  
429 scripts (Natick, Massachusetts: The MathWorks Inc.) and a digital-analog converter (DAC; Data  
430 Translation, Inc.; Marlborough, MA). After stable transgene expression was determined, the animals  
431 were stimulated again using the same paradigms as above and the resulting activity was recorded.

432 Electrophysiological and MEG recordings after stable expression were again done simultaneously using  
433 the Nicolet system for acquiring electrophysiology during MEG and also separately.

434

435 The optrodes were tested in saline prior to implantation; *in vitro* two weeks after transfection; as well as  
436 post mortem. As a positive control for the electrode and MSI, analysis of visual stimulation was  
437 conducted. One hundred nineteen, 50 ms pulses of white light were presented via fiber optic cable to  
438 the left lower quadrant of the visual field of the left eye of the sedated animal. The right eye was taped  
439 shut per typical recording protocol while the left eye remained open. The fiber optic cable was  
440 channeled into the helmet slightly lateral and inferior to the left eye. The light pulses had a 3 s ISI via  
441 LED, and the experiment was performed in both the electrophysiology suite and in the MEG MSR.  
442 Timing was controlled by custom MATLAB scripts.

443

#### 444 ***Analysis***

445 All analyzed data were derived from recordings in which motion was no greater than 0.2 mm. Head  
446 motion was nearly eliminated through the use of anesthesia and a carefully supported head.

447

448 Data preprocessing, head model creation, and beamforming were performed using CTF MEG™ Software  
449 (CTF MEG International Services Limited Partnership, Coquitlam, BC, Canada). MEG preprocessing  
450 included DC-offsetting, application of synthetic third order gradiometry, and powerline filtering<sup>7</sup>. MEG  
451 data were then co-registered with the monkey's anatomical MRI data using the standard three-point  
452 fiducials. From this, a multiple-overlapping-spheres model of the head and whole brain volume was  
453 generated<sup>25</sup>. Dual-state SAM<sup>3,5</sup> was applied to each active time segment and an equal length control  
454 segment composed of data preceding the stimulus, to construct 3D images of the entire brain volume.  
455 Noise normalized t-deviate statistical parametric maps of source power were derived from the

456 beamformer output at a voxel size ranging from 0.75 - 1.5 mm<sup>3</sup>. Results are shown for 750 μm<sup>3</sup> analyses  
457 due to superior accuracy in source localization. Such small voxel sizes were possible because of  
458 extremely low motion associated with this preparation. The degree of activation in each voxel is  
459 indicated by a pseudo t-score. Local maxima (synchronization) and minima (desynchronization) of the  
460 SAM maps were identified as voxels of peak activity.

461  
462 SAM time-frequency analysis parameters were determined in part by the time-frequency characteristics  
463 of the input stimulus and by the power spectral densities (PSDs) and timing of the neural response  
464 measured on the LFP during simultaneous MEG/LFP recordings in the MSR when such recordings were  
465 obtained. In general, for brief stimuli, the beamforming windows necessary to detect activity changes  
466 also needed to be short, with a correspondingly wider frequency band to provide enough samples for  
467 analysis. For the sine wave inputs, the SAM frequency bands were set to bracket the sine frequency, and  
468 because the sine inputs were of longer duration the beamforming windows were correspondingly  
469 longer, both to provide enough samples for the analysis and also because the brain circuits appeared to  
470 sustain activity for a long time (see Results). Specific arcuate beamforming parameters for each stimulus  
471 type are as follows. For the 50 ms square pulses (120 trials, 5 s ISI), dual-state SAM relative to stimulus  
472 onset was conducted in 50 ms steps from 100-500 ms inclusive and for another window of 75 ms  
473 (Figures 2ai-iv). For each time window, the high-pass was set above the threshold for aliasing and the  
474 low-passes were varied in a series of 10 Hz steps ranging from 40-100 Hz and another step at 35 Hz.  
475 Peak voxels were identified in each whole-brain, time-frequency map and because peak voxels often  
476 appeared in multiple maps the time-frequency combination that expressed the maximal pseudo-t score  
477 for each peak was chosen as the representative map. A primate neuroanatomist (J.D.) confirmed the  
478 neuroanatomic localizations of the peaks to their target structures and also for downstream structures  
479 that were also activated following stimulation. For the 8 Hz sine waves (3 s stimulus length, 20 trials, 10

480 s ISI, Figure 2bi) the SAM time-frequency parameters were 1-4 s windows in 500 ms steps, a DC high-  
481 pass, and low-pass steps of 12, 15, 20, and 50 Hz. For the 40 Hz sine waves (3 s stimulus length, 20 trials,  
482 10 s ISI, Figure 2bii) the SAM parameters were 500 ms - 4 s windows in 500 ms steps, a high-pass series  
483 ranging from 10-35 Hz in 5 Hz steps, and low-pass steps at 50 and 55 Hz. For the 10 ms square pulses  
484 (100 trials, 6 s ISI, Figure 2biii), SAM was conducted in 50 ms steps for windows from 100-750 ms, plus  
485 additional windows at 125 ms and 1 s, while the frequency bands had a minimum high-pass set to  
486 prevent aliasing for each time window, and a low-pass set at 50, 70, and 100 Hz. For the 20 Hz square  
487 pulse train (5 ms width squares, 10 pulses/train, 100 trains, 6 s ISI, Figure 2biv) the SAM time frequency  
488 parameters included windows from 100-500 ms conducted in 100 ms steps, plus an extra window at 750  
489 ms, a high-pass set to prevent aliasing for each window, and a low-pass at either 70 or 100 Hz.

490

491 Beamforming parameters for the hippocampal stimulation experiments are as follows. For the single 60  
492 s, 20 Hz sine wave (5 V, Figure 3ai-iv) the dual-state SAM time windows were 2, 3, 4, 5, 10, 20, 30, and  
493 60 s, the high-pass was either 10 or 15 Hz, and the low-pass was 30 Hz. For the single sawtooth ramps  
494 (150 ms duration, 20 trials at an intensity of 4.996 V and 9.528 W, 6 s ISI, Figure 3bi) the SAM  
495 parameters included 150-400 ms time windows in 50 ms steps, plus additional windows at 125 ms and  
496 500 ms, a high-pass set to prevent aliasing per time window, and low-passes ranging from 40-55 Hz in 5  
497 Hz steps, plus additional windows at 70, 100, and 120 Hz, plus at 35 Hz for windows of sufficiently long  
498 duration. For the 10 ms square pulse stimuli (114 trials, 4.996 V/9.28 W, 6 s ISI, Figure 3bii) the SAM  
499 time-frequency parameters included 50, 175 ms windows, in 25 ms steps, a high-pass set to prevent  
500 aliasing per time window, and low-passes ranging from 30-100 Hz (when the time window permitted a  
501 small low pass) in 5 Hz steps, with additional windows at 120 and 200 Hz. For the 8 Hz sine waves (3 s  
502 duration, 20 trials, 10 s ISI, Figure 3biii) the beamforming parameters included 1-3 s windows in 500 ms  
503 steps, a DC high-pass, and a low-pass of 12, 15, or 20 Hz. For the 40 Hz sine waves (3 s duration, 20 trials,

504 10 s ISI, Figure 3biv) the beamforming parameters included 1-3 s windows in 500 ms steps, high-passes  
505 of 10, 20, 30 or 35 Hz, and low-passes of 50, 55, or 60 Hz.

506

507 Beamforming for the visual stimulation experiment (Figure S1) included 50-300 ms windows in 25 ms  
508 steps, a high-pass set to prevent aliasing per time window, and low-passes ranging from 30-70 Hz in 5 Hz  
509 steps, plus additional windows at 80, 90, 100, 120, and 200 Hz.

510

511 LFP data were analyzed using SciWorks, Neuroexplorer (Nex Technologies, Madison, AI), and custom  
512 scripts in MATLAB. Peak amplitude of the LFP in response to optical stimulation during electrophysiology  
513 recordings was measured between two-week, five-week, and seven-week time points. Peak amplitudes  
514 for each replicate were measured at the time point corresponding to the peak of the average trace for  
515 each light intensity.

516

### 517 ***Histology***

518 To confirm the anatomical position of the optrode placement and injection site, at the completion of the  
519 imaging study, one animal was necropsied by first sedating with ketamine followed by an overdose with  
520 pentobarbital. A thoracotomy was conducted and the animal was transcardially perfused with ice-cold  
521 phosphate buffered saline followed by 4% paraformaldehyde fixative. The brain was extracted and  
522 sectioned at a 50  $\mu\text{m}$  thickness on a modified Vibratome 1000 (Leica Biosystems Inc.; Buffalo Grove, IL).  
523 Sections of tissue were mounted on gelatin coated microscope slides and imaged on a Zeiss LSM 710  
524 confocal microscope with 10X and 20X objectives (Carl Zeiss Microscopy, LLC; Thornwood, NY).

525

### 526 **REFERENCES**

- 527 1. Nasiotis, K., Clavagnier, S., Baillet, S. & Pack, C. C. High-resolution retinotopic maps estimated with  
528 magnetoencephalography. *NeuroImage* doi:10.1016/j.neuroimage.2016.10.017
- 529 2. Vrba, J. & Robinson, S. E. Signal Processing in Magnetoencephalography. *Methods* **25**, 249–271  
530 (2001).
- 531 3. Robinson, S. & Vrba, J. Functional Neuroimaging by Synthetic Aperture Magnetometry. in *11th Int.*  
532 *Conf. on Biomagnetism* (1998).
- 533 4. Vrba, J., Robinson, S. E. & McCubbin, J. How many channels are needed for MEG? *Neurol. Clin.*  
534 *Neurophysiol. NCN* **2004**, 99 (2004).
- 535 5. Hillebrand, A. & Barnes, G. R. in (ed. Neurobiology, B.-I. R. of) **68**, 149–171 (Academic Press, 2005).
- 536 6. Troebinger, L. *et al.* High precision anatomy for MEG. *NeuroImage* **86**, 583–591 (2014).
- 537 7. Stapleton-Kotloski, J. R. *et al.* Localization of interictal epileptiform activity using  
538 magnetoencephalography with synthetic aperture magnetometry in patients with a vagus nerve  
539 stimulator. *Brain Imaging Methods* **5**, 244 (2014).
- 540 8. Robinson, S., Nagarajan, S., Mantle, M., Gibbons, V. & Kirsch, H. Localization of Interictal Spikes  
541 using SAM(g2) and Dipole Fit. *Neurol. Clin. Neurophysiol. NCN* **2004**, 74 (2004).
- 542 9. Ukai, S. *et al.* SAM(g2) analysis for detecting spike localization: a comparison with clinical symptoms  
543 and ECD analysis in an epileptic patient. *Neurol. Clin. Neurophysiol. NCN* **2004**, 57 (2004).
- 544 10. Ishii, R. *et al.* Spatially filtered magnetoencephalography compared with electrocorticography to  
545 identify intrinsically epileptogenic focal cortical dysplasia. *Epilepsy Res.* **81**, 228–232 (2008).
- 546 11. Cornwell, B. R., Johnson, L. L., Holroyd, T., Carver, F. W. & Grillon, C. Human hippocampal and  
547 parahippocampal theta ( $\theta$ ) during goal-directed spatial navigation predicts performance on a virtual  
548 Morris water maze. *J. Neurosci. Off. J. Soc. Neurosci.* **28**, 5983–5990 (2008).
- 549 12. Cornwell, B. R. *et al.* Evoked amygdala responses to negative faces revealed by adaptive MEG  
550 beamformers. *Brain Res.* **1244**, 103–112 (2008).

- 551 13. Mikuni, N. *et al.* Simultaneous Recording of Epileptiform Discharges by MEG and Subdural  
552 Electrodes in Temporal Lobe Epilepsy. *NeuroImage* **5**, 298–306 (1997).
- 553 14. Baumgartner, C., Patarraia, E., Lindinger, G. & Deecke, L. Neuromagnetic recordings in temporal lobe  
554 epilepsy. *J. Clin. Neurophysiol.* **17**, 177–189 (2000).
- 555 15. Shigeto, H. *et al.* Feasibility and limitations of magnetoencephalographic detection of epileptic  
556 discharges: Simultaneous recording of magnetic fields and electrocorticography. *Neurol. Res.* **24**,  
557 531–536 (2002).
- 558 16. Kharkar, S. & Knowlton, R. Magnetoencephalography in the presurgical evaluation of epilepsy.  
559 *Epilepsy Behav.* **46**, 19–26 (2015).
- 560 17. Boyden, E. S., Zhang, F., Bamberg, E., Nagel, G. & Deisseroth, K. Millisecond-timescale, genetically  
561 targeted optical control of neural activity. *Nat Neurosci* **8**, 1263–1268 (2005).
- 562 18. Han, X. in *Progress in Brain Research* **196**, 215–233 (Elsevier, 2012).
- 563 19. Cardin, J. A., Kumbhani, R. D., Contreras, D. & Palmer, L. A. Cellular mechanisms of temporal  
564 sensitivity in visual cortex neurons. *J. Neurosci. Off. J. Soc. Neurosci.* **30**, 3652–3662 (2010).
- 565 20. Klorig, D. C. & Godwin, D. W. A magnetic rotary optical fiber connector for optogenetic experiments  
566 in freely moving animals. *J. Neurosci. Methods* **227**, 132–139 (2014).
- 567 21. Huang, M. X., Mosher, J. C. & Leahy, R. M. A sensor-weighted overlapping-sphere head model and  
568 exhaustive head model comparison for MEG. *Phys. Med. Biol.* **44**, 423 (1999).
- 569 22. Di Russo, F., Martínez, A., Sereno, M. I., Pitzalis, S. & Hillyard, S. A. Cortical sources of the early  
570 components of the visual evoked potential. *Hum. Brain Mapp.* **15**, 95–111 (2002).
- 571 23. Belmalih, A. *et al.* A multiarchitectonic approach for the definition of functionally distinct areas and  
572 domains in the monkey frontal lobe. *J. Anat.* **211**, 199–211 (2007).
- 573 24. BrainMaps.org - Interactive Brain Atlas, Neuroanatomy, Brain Mapping. Available at:  
574



- 575 viewer.php?datid=42&sname=220&hname=arcuate%20sulcus&hlabel=AS. (Accessed: 21st  
576 September 2016)
- 577 25. Woods, R. P. *et al.* A web-based brain atlas of the vervet monkey, *Chlorocebus aethiops*.  
578 *NeuroImage* **54**, 1872–1880 (2011).
- 579 26. Worbe, Y., Lehericy, S. & Hartmann, A. Neuroimaging of tic genesis: Present status and future  
580 perspectives. *Mov. Disord.* **30**, 1179–1183 (2015).
- 581 27. Worbe, Y. *et al.* Altered structural connectivity of cortico-striato-pallido-thalamic networks in Gilles  
582 de la Tourette syndrome. *Brain* **138**, 472–482 (2015).
- 583 28. Ioannides, A. A. Magnetoencephalography as a research tool in neuroscience: state of the art.  
584 *Neurosci. Rev. J. Bringing Neurobiol. Neurol. Psychiatry* **12**, 524–544 (2006).
- 585 29. Buzsáki, G., Anastassiou, C. A. & Koch, C. The origin of extracellular fields and currents--EEG, ECoG,  
586 LFP and spikes. *Nat. Rev. Neurosci.* **13**, 407–420 (2012).
- 587 30. Jonmohamadi, Y. & Jones, R. D. Source-space ICA for MEG source imaging. *J. Neural Eng.* **13**, 016005  
588 (2016).
- 589 31. Bauer, M., Trahms, L. & Sander, T. Magnetoencephalographic accuracy profiles for the detection of  
590 auditory pathway sources. *Biomed. Eng. Biomed. Tech.* **60**, 135–145 (2014).
- 591 32. Wilson, T. W. *et al.* A MEG investigation of somatosensory processing in the rhesus monkey.  
592 *NeuroImage* **46**, 998–1003 (2009).
- 593 33. Zumer, J. M. *et al.* MEG in the macaque monkey and human: Distinguishing cortical fields in space  
594 and time. *Brain Res.* **1345**, 110–124 (2010).
- 595 34. Kaiboriboon, K., Nagarajan, S., Mantle, M. & Kirsch, H. E. Interictal MEG/MSI in intractable mesial  
596 temporal lobe epilepsy: Spike yield and characterization. *Clin. Neurophysiol.* **121**, 325–331 (2010).

- 597 35. Bagić, A. I., Knowlton, R. C., Rose, D. F. & Ebersole, J. S. American Clinical Magnetoencephalography  
598 Society Clinical Practice Guideline 1: Recording and Analysis of Spontaneous Cerebral Activity\*. *J.*  
599 *Clin. Neurophysiol.* **1** (2011). doi:10.1097/WNP.0b013e3182272fed
- 600 36. Giulioni, M. *et al.* Seizure outcome in surgically treated drug-resistant mesial temporal lobe epilepsy  
601 based on the recent histopathological classifications: Clinical article. *J. Neurosurg.* 1–11 (2013).
- 602 37. Han, X. *et al.* Millisecond-Timescale Optical Control of Neural Dynamics in the Nonhuman Primate  
603 Brain. *Neuron* **62**, 191–198 (2009).
- 604 38. Watakabe, A. *et al.* Comparative analyses of adeno-associated viral vector serotypes 1, 2, 5, 8 and 9  
605 in marmoset, mouse and macaque cerebral cortex. *Neurosci. Res.* **93**, 144–157 (2015).
- 606 39. Davidson, B. L. & Breakefield, X. O. Viral vectors for gene delivery to the nervous system. *Nat. Rev.*  
607 *Neurosci.* **4**, 353–364 (2003).
- 608 40. Lin, P., Fang, Z., Liu, J. & Lee, J. H. Optogenetic Functional MRI. *J. Vis. Exp. JoVE* (2016).  
609 doi:10.3791/53346
- 610 41. Lin, F.-H., Witzel, T., Zeffiro, T. A. & Belliveau, J. W. Linear constraint minimum variance beamformer  
611 functional magnetic resonance inverse imaging. *NeuroImage* **43**, 297–311 (2008).
- 612 42. Lin, F.-H. *et al.* Increasing fMRI Sampling Rate Improves Granger Causality Estimates. *PLOS ONE* **9**,  
613 e100319 (2014).
- 614 43. Lin, F.-H. *et al.* Ultrafast inverse imaging techniques for fMRI. *NeuroImage* **62**, 699–705 (2012).
- 615 44. Bassett, D. S. *et al.* Dynamic reconfiguration of human brain networks during learning. *Proc. Natl.*  
616 *Acad. Sci.* **108**, 7641–7646 (2011).
- 617 45. Fatima, Z., Kovacevic, N., Masic, B. & McIntosh, A. R. Dynamic functional connectivity shapes  
618 individual differences in associative learning. *Hum. Brain Mapp.* n/a-n/a (2016).  
619 doi:10.1002/hbm.23285

- 620 46. Hillebrand, A., Singh, K. D., Holliday, I. E., Furlong, P. L. & Barnes, G. R. A new approach to  
621 neuroimaging with magnetoencephalography. *Hum. Brain Mapp.* **25**, 199–211 (2005).
- 622 47. Huang, M.-X. *et al.* MEG source imaging method using fast L1 minimum-norm and its applications to  
623 signals with brain noise and human resting-state source amplitude images. *NeuroImage* **84**, 585–  
624 604 (2014).
- 625 48. Hass, C. A. & Glickfeld, L. L. High fidelity optical excitation of cortico-cortical projections at  
626 physiological frequencies. *J. Neurophysiol.* jn.00456.2016 (2016). doi:10.1152/jn.00456.2016
- 627 49. Duffy, B. A., Choy, M., Chuapoco, M. R., Madsen, M. & Lee, J. H. MRI compatible optrodes for  
628 simultaneous LFP and optogenetic fMRI investigation of seizure-like afterdischarges. *NeuroImage*  
629 **123**, 173–184 (2015).
- 630 50. Klorig, D. C., Alberto, G. E., Smith, T., & Godwin, D. W. Optogenetically-induced population discharge  
631 threshold as a sensitive measure of network excitability. *ENEURO* **6**(6) 1-16 (2019).  
632 doi:10.1523/ENEURO.0229-18.2019.

633

634

635

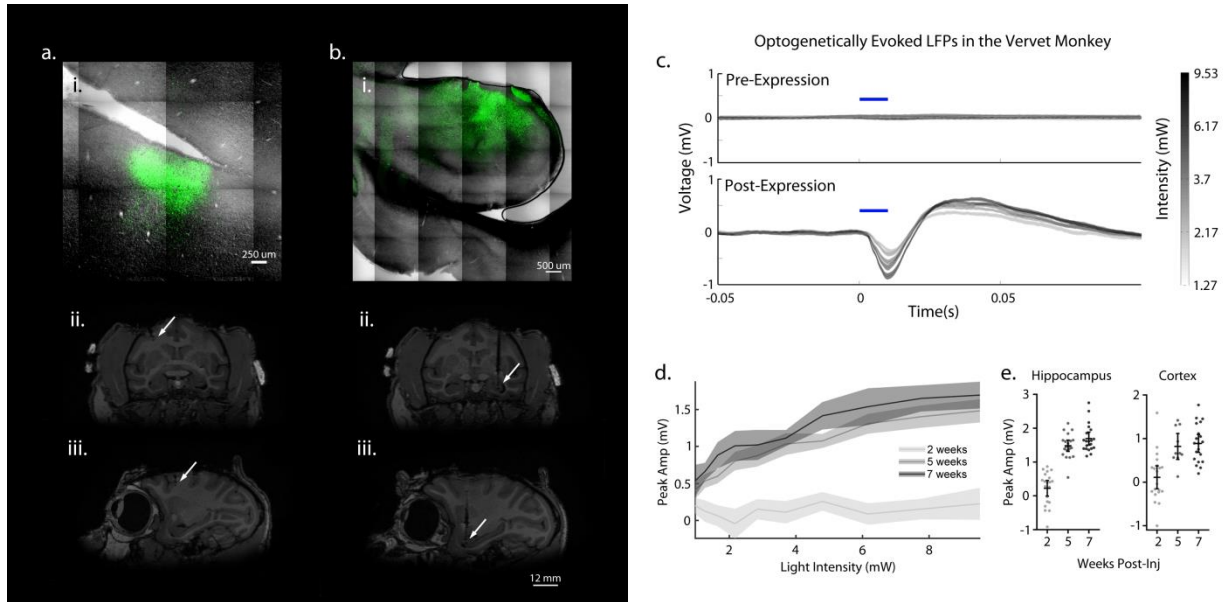

636

637

**Figure 1. Location of optogenetic protein expression and light evoked responses.** ai. Chr2-eYFP labeled neurons confined to gray matter of the posterior wall of right arcuate sulcus corresponding to area 8a, white line indicates approximate boundary between gray and white matter. Coronal (ii) and sagittal (iii) MRI demonstrating colocalization of the optrode. bi. Chr2-eYFP labeled neurons in the anterior dorsolateral aspect of left hippocampus corresponding to area CA3 indicate transgene expression. Coronal (ii) and sagittal (iii) MRI demonstrating colocalization of the optrode. c. Example of averaged response to stimulation at five intensity levels (grey to black) in hippocampus showing absence of response in week 2 (upper trace) compared to the large, biphasic LFP in week 7 (lower trace). Blue bar indicates stimulus onset and duration. d. Average intensity-response curves for each of the three time points. Bands = 95% CI. e. Maximum intensity stimulation (9.53 mW) of cortex and hippocampus at 7 weeks post transfection elicited a response as measured by the LFP electrode that was greater than at 2 weeks post-transfection. AS= arcuate sulcus; GM= gray matter; WM = white matter; DG= dentate gyrus; SB= subiculum.

644

645

646

647

648

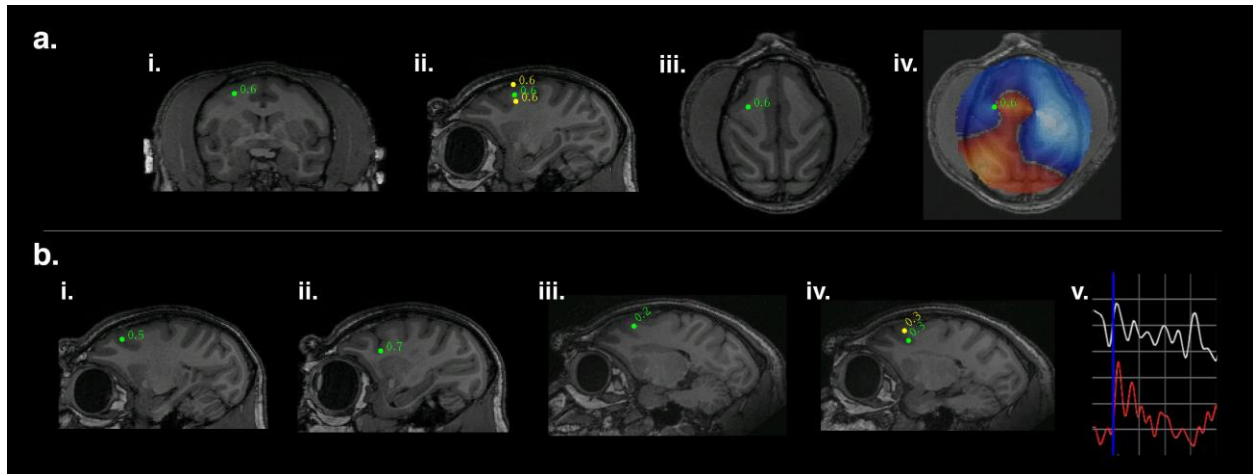

649

650

651

652

653

654

655

656

657

658

659

660

661

662

**Figure 2. SAM source localization of optogenetically evoked MEG responses in the right arcuate sulcus. a.** An example of optogenetic stimulation localized by dual-state SAM to the posterior bank of right arcuate sulcus in the coronal (i), sagittal (ii), and axial planes (iii), for a stimulus of 50 ms square light pulses. The whole brain, un-thresholded, dual-state SAM SPM (voxel size of  $750 \mu\text{m}^3$ , iv) reveals synchronized activity (red voxels) arising from the stimulation site and surrounded by desynchronization (blue voxels). Green dot and number indicate a peak in the SPM plus the associated pseudo-t value. **b.** Right SAM arcuate peaks for four additional and different optical stimuli in two different NHPs. **bi-ii** present arcuate activations for one NHP and **iii-iv** shows arcuate stimulation for a second NHP. **bi-ii** is the same subject as presented in **ai-iv**; i depicts the arcuate peak for 8 Hz sine waves, and ii shows the arcuate peak for 40 Hz sine waves. Arcuate stimulations in a second NHP are presented in **iii-iv**; iii shows the arcuate peak for 10 ms square pulses and iv shows the arcuate peak for 20 Hz square wave pulse trains. A single trial (v) of an LFP recorded by the optrode and a simultaneous SAM virtual electrode for an arcuate peak (as seen in **bi-ii**). Blue vertical line indicates stimulus onset (10 ms pulses). Both the LFP (white) and virtual electrode (red) exhibit a rapid peak following stimulation and have similar features and time courses. One gray square in the graph = 100 ms on the abscissa and for the ordinate, 35  $\mu\text{V}$  for the LFP or 15 nA-m for the virtual electrode. All maps follow radiological conventions.

663

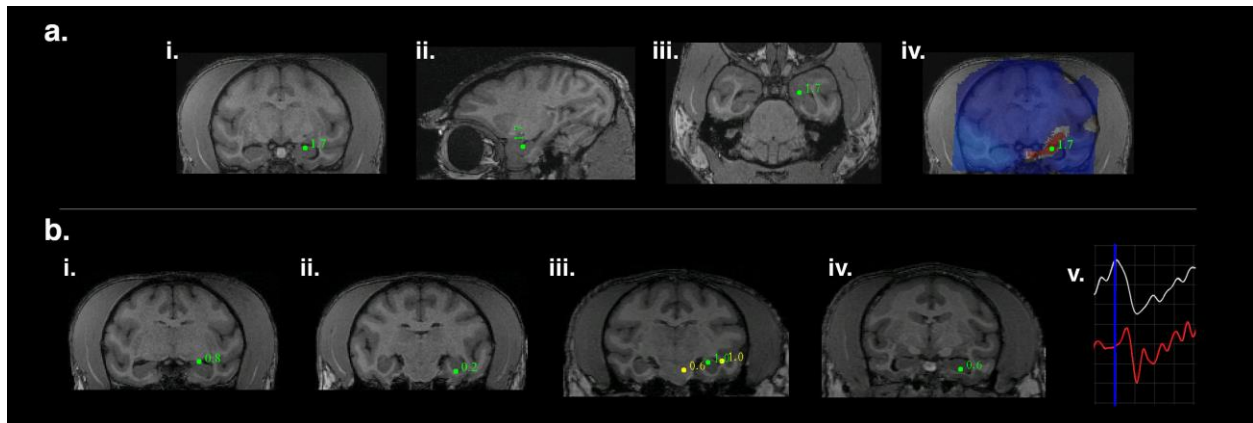

664

665

666

667

668

669

670

671

672

673

674

675

676

677

678

679

680

681

682

**Figure 3. SAM source localization of optogenetically evoked MEG responses in the left hippocampus. a.** SAM left hippocampal peak in coronal (i), sagittal (ii), and axial planes (iii) for a 20 Hz sine wave input in a third NHP. The whole brain, un-thresholded, SAM SPM shows synchronized activity arising from the stimulation site and surrounded by desynchronization (iv). **b.** Left SAM hippocampal peaks for four additional and different stimuli in two different NHPs. **bi-ii** is the same subject as presented in **a**; i and ii show hippocampal peaks for single 150 ms sawtooth trials or 10 ms square pulses, respectively. **biii-iv** show hippocampal peaks for 8 Hz or 40 Hz sine waves, respectively, in the same subject as in **Figure 2a**. A single trial (**v**) of a simultaneous LFP and SAM virtual electrode for hippocampus (as seen in **bi**). Blue vertical line indicates stimulus onset (sawtooth inputs). Both the LFP (white) and virtual electrode (red) peak rapidly following stimulation and have similar features and time courses. One gray square = 50 ms (abscissa) and 5 V for the LFP (amplified) or 500 nA-m for the virtual electrode (ordinate).



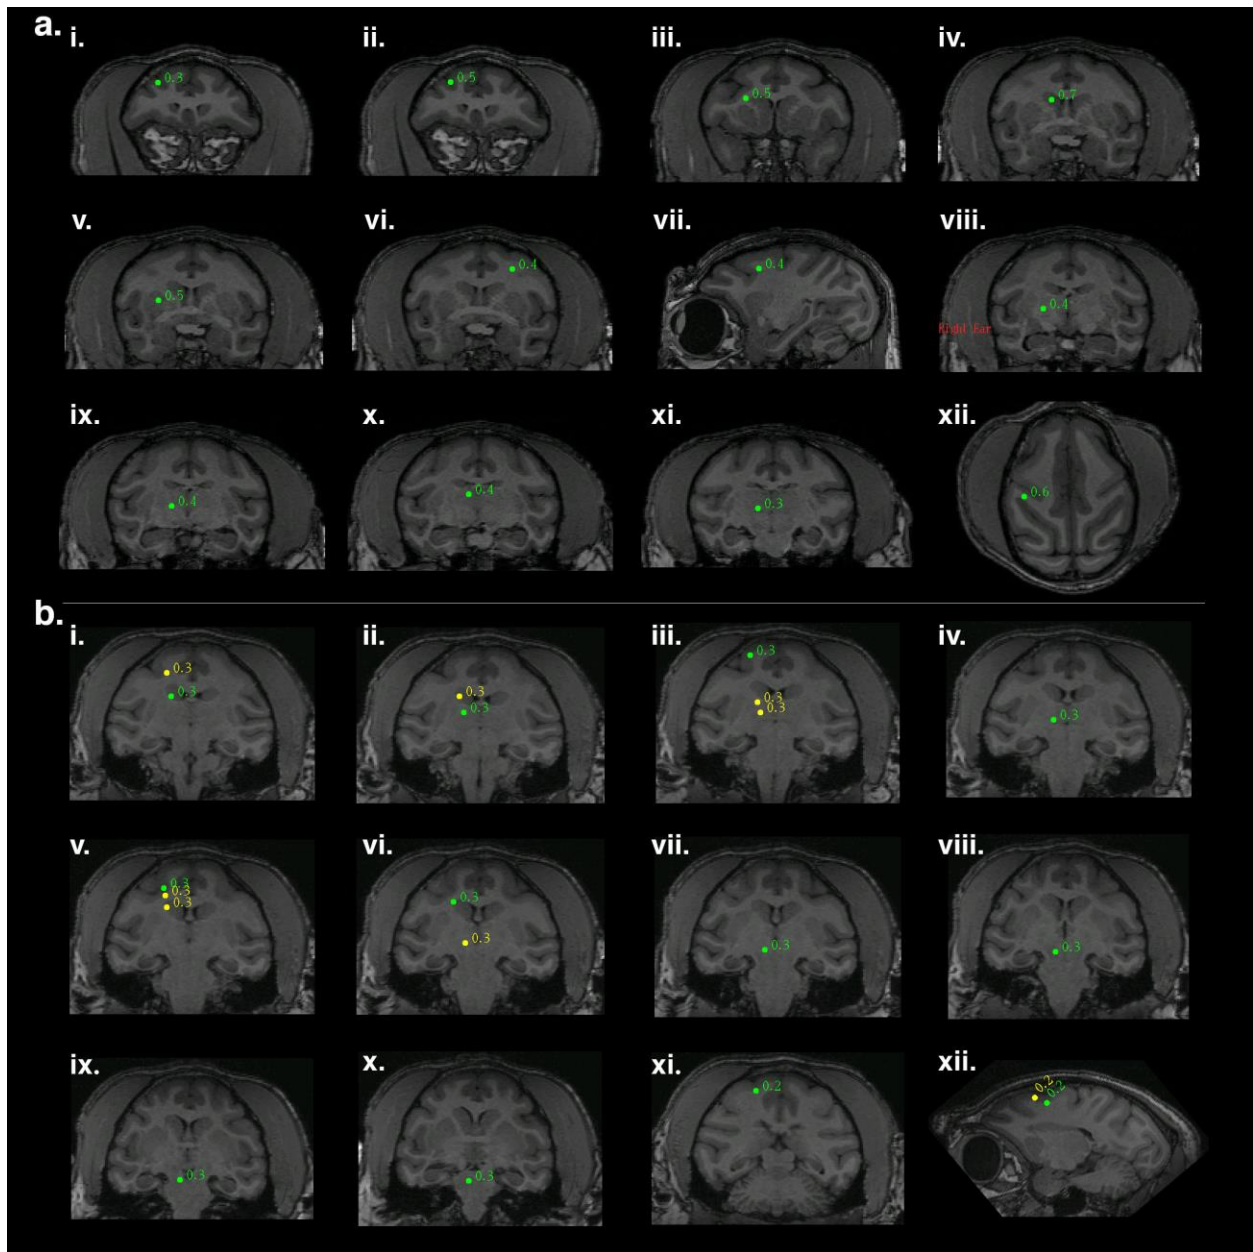

683  
 684 **Figure 4. Arcuate optogenetic stimulation results in propagation through downstream networks. a.** Identification of  
 685 cortico-striato-pallido-thalamo-cortical (CSPTC) network activity in response to 8 Hz sine wave stimulation of right  
 686 arcuate sulcus. SAM analysis of optical input to arcuate sulcus reveals a known functional network with peaks in: i. right  
 687 inferior bank arcuate sulcus, ii. right superior bank arcuate sulcus, the site of stimulation, iii. right corona radiata/  
 688 dorsolateral caudate n., iv. right caudate n. v. right putamen/ external segment of globus pallidus, vi. and vii. posterior  
 689 bank of contralateral (left) arcuate sulcus, coronal and sagittal slices, respectively, viii. right globus pallidus, ix. right  
 690 ventroposterior medial / ventroposterior lateral n. of thalamus, x. right medial dorsal n. of thalamus, xi. right ventral  
 posterior thalamus, and xii. parietal-occipital association area of the intraparietal sulcus. **b.** A second example of right  
 hemispheric CSPTC network activity in a different NHP in response to 20 Hz square wave pulse trains with SAM peaks as  
 follows: i. caudate n. (green) and cortical area 3 (yellow), ii. thalamus (green) and caudate n. (yellow), iii. posterior  
 dorsal bank of the arcuate sulcus (green) and two thalamic peaks (yellow), iv. thalamus, v. posterior ventral bank of  
 arcuate sulcus (green, site of stimulation), corpus callosum (yellow), and caudate n. (yellow), vi. caudate n. (green) and  
 mesencephalic nuclei (yellow), vii. mesencephalic n., viii. substantia nigra, ix. tegmental n., x. pontine or mesencephalic  
 n., and xi., and xii. all peaks in primary motor cortex (area 4).

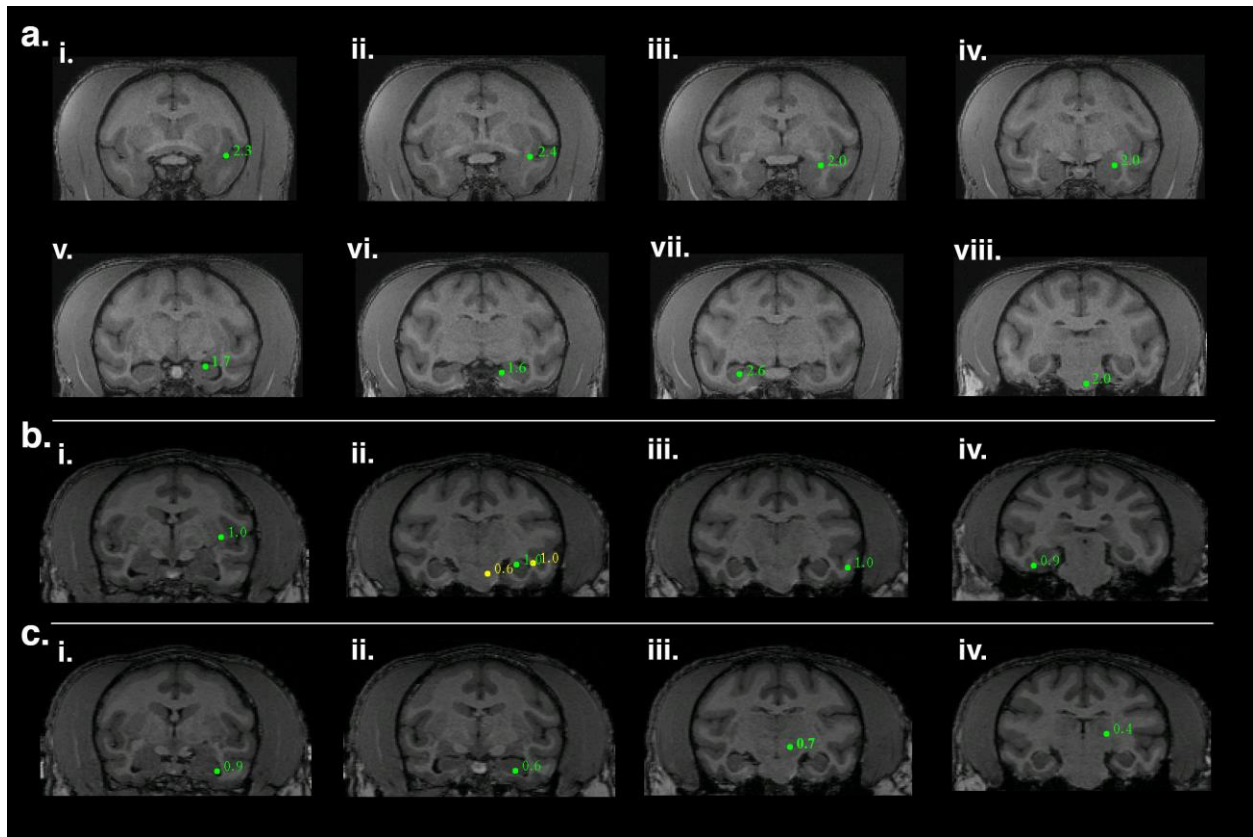

691

692

693

694

695

696

697

698

699

700

701

702

703

704

**Figure 5. Hippocampal optogenetic stimulation results in propagation through downstream networks. a.** Functional hippocampal and temporal network engaged by a 20 Hz optical sine input to left hippocampus (**v**) with SAM peaks as follows: **i.** left insular proisocortex/temporopolar proisocortex, **ii.** left para-insular cortex, **iii.** left dorsolateral amygdala (lateral n.), **iv.** left basolateral/lateral amygdala, **v.** left hippocampus, site of stimulation, **vi.** left parasubiculum/presubiculum of hippocampus, **vii.** contralateral (right) hippocampus, and **viii.** left pontine reticular activating formation. **b.** A second example of hippocampal network activity in a different NHP in response to 8 Hz sine wave input with SAM peaks as follows: **i.** left putamen, **ii.** PGa/IPa association areas of left temporal cortex (lateral yellow peak), left hippocampus (green peak, site of stimulation), and possible left red n. (yellow, medial peak), **iii.** area TEA/TEM of left temporal cortex, and **iv.** area TL/TFM of right temporal cortex. **c.** A third example of hippocampal network activity in response to 40 Hz sine wave input (same subject as in **b.**) with SAM peaks as follows: **i.** left anterior hippocampus, **ii.** left hippocampus, site of stimulation, **iii.** left deep mesencephalic n., and **iv.** left pulvinar n. of thalamus.



705

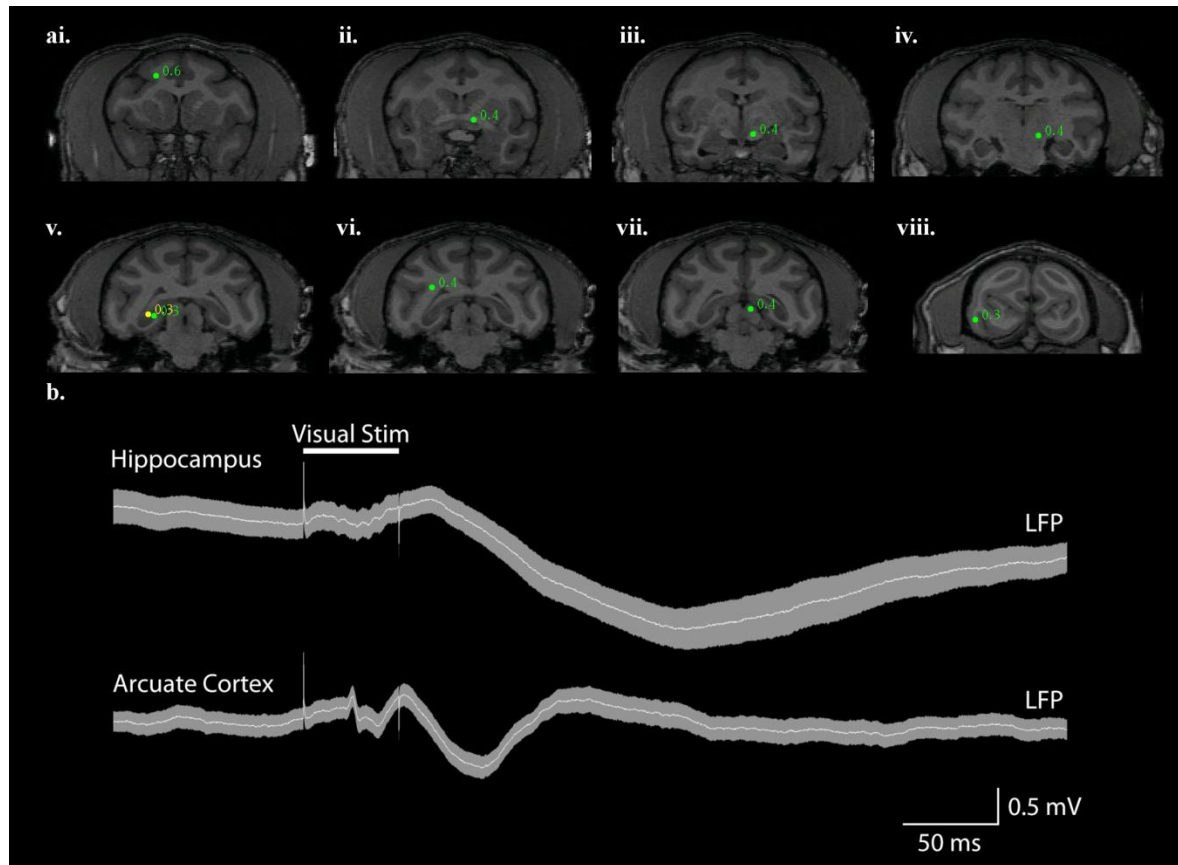

706

707

708

**Supplementary Figure 1. Visual stimulation engages related brain regions.** **a.** Identification of functional networks in response to 50 ms light presentations to the left lower visual quadrant of the left eye. SAM analysis of the visual stimulus reveals both peaks in the known visual network as well as additional peaks, including: **i.** right anterior arcuate sulcus, **ii.** left anterior commissure, **iii.** left optic tract, **iv.** left lateral geniculate n. **v.** right posterior hippocampus, **vi.** right posterior white matter tracts, **vii.** left superior colliculus, and **viii.** right occipital cortex. **b.** LFPs recorded from right arcuate cortex and left hippocampus revealed clear event-related potentials in response to visual stimulation.
